# Supplementary material for: Mortality and neurological outcomes in extremely and very preterm infants born to mothers with hypertensive disorders of pregnancy
Source: PubMed Central journal article supplement (PMC7814115; doi:10.1038/s41598-021-81292-7), 2021-01-18
Supplement: 41598_2021_81292_MOESM2_ESM.pdf [file 41598_2021_81292_MOESM2_ESM.pdf]

**Mortality and neurological outcomes in extremely and very preterm infants born to mothers with hypertensive disorders of pregnancy.**

Noriyuki Nakamura<sup>1</sup>, Takafumi Ushida<sup>1\*</sup>, Masahiro Nakatochi<sup>2</sup>, Yumiko Kobayashi<sup>3</sup>,  
Yoshinori Moriyama<sup>1,4</sup>, Kenji Imai<sup>1</sup>, Tomoko Nakano-Kobayashi<sup>1</sup>, Masahiro Hayakawa<sup>5</sup>,  
Hiroaki Kajiyama<sup>1</sup>, Fumitaka Kikkawa<sup>1</sup>, Tomomi Kotani<sup>1,6</sup>, for the Neonatal Research  
Network of Japan

<sup>1</sup>Department of Obstetrics and Gynecology, Nagoya University Graduate School of Medicine,  
Nagoya, Japan

<sup>2</sup>Division of Public Health Informatics, Department of Integrative Health Science, Nagoya  
University Graduate School of Medicine, Nagoya, Japan

<sup>3</sup>Data Science Division, Data Coordinating Center, Department of Advanced Medicine,  
Nagoya University Hospital, Nagoya, Japan

<sup>4</sup>Department of Obstetrics and Gynecology, Fujita Health University Graduate School of  
Medicine, Toyoake, Japan

<sup>5</sup>Division of Neonatology, Center for Maternal-Neonatal Care, Nagoya University Hospital,  
Nagoya, Japan

<sup>6</sup>Division of Perinatology, Center for Maternal-Neonatal Care, Nagoya University Hospital,

Nagoya, Japan

Supplementary Table 1. Baseline maternal and neonatal characteristics with and without complete data.

| Variables                       | With complete data<br>(n = 21,659) | Without complete data<br>(n = 7,488) | <i>p</i> -value |
|---------------------------------|------------------------------------|--------------------------------------|-----------------|
| <b>Maternal characteristics</b> |                                    |                                      |                 |
| Maternal age (years)            | 31.7 ± 5.5                         | 31.6 ± 5.5                           | 0.02            |
| Primiparous                     | 10,713 (49.5%)                     | 3,797/7,304 (52.0%)                  | <0.01           |
| Gestational age (weeks)         | 27.6 ± 2.5                         | 27.8 ± 2.5                           | <0.01           |
| Caesarean section               | 16,198 (74.8%)                     | 5,230/7,396 (70.7%)                  | <0.01           |
| HDP                             | 4,629 (21.4%)                      | 1,417/7,370 (19.2%)                  | <0.01           |
| DM or GDM                       | 665 (3.1%)                         | 158/7,233 (2.2%)                     | <0.01           |
| Histological chorioamnionitis   | 9,224 (42.6%)                      | 660/1,765 (37.4%)                    | <0.01           |
| Antenatal corticosteroid        | 12,241 (56.5%)                     | 3,141/7,228 (43.5%)                  | <0.01           |
| PROM                            | 7,932 (36.6%)                      | 2,463/7,419 (33.2%)                  | <0.01           |
| Year of delivery                |                                    |                                      |                 |
| 2003-2008                       | 6,530 (30.1%)                      | 3,710 (49.5%)                        | <0.01           |
| 2009-2015                       | 15,129 (69.9%)                     | 3,778 (50.5%)                        |                 |
| <b>Neonatal characteristics</b> |                                    |                                      |                 |
| Male                            | 11,291 (52.1%)                     | 3,958/7,473 (53.0%)                  | 0.21            |
| Birth weight (g)                | 954 ± 297                          | 975 ± 300                            | <0.01           |
| Height (cm)                     | 34.3 ± 4.0                         | 34.8 ± 4.0                           | <0.01           |

Data are given as mean ± standard deviation for continuous variables and n (%) for categorical variables. HDP, hypertensive disorders of pregnancy; DM, diabetes mellitus; GDM, gestational diabetes mellitus; PROM, premature rupture of membranes.

Supplementary Table 2. Baseline characteristics before 1:1 matching in the HDP and non-HDP groups

| Variables                       | HDP<br>(n = 4,629) | non-HDP<br>(n = 17,030) | <i>p</i> -value | Total<br>(n = 21,659) |
|---------------------------------|--------------------|-------------------------|-----------------|-----------------------|
| <b>Maternal characteristics</b> |                    |                         |                 |                       |
| Maternal age (years)            | 33.9 ± 5.0         | 31.2 ± 5.4              | <0.01           | 31.7 ± 5.5            |
| Primiparous                     | 2,651 (57.3%)      | 8,062 (47.3%)           | <0.01           | 10,713 (49.5%)        |
| Gestational age (weeks)         | 28.8 ± 2.2         | 27.3 ± 2.4              | <0.01           | 27.6 ± 2.5            |
| Caesarean section               | 4,450 (96.1%)      | 11,748 (69.0%)          | <0.01           | 16,198 (74.8%)        |
| DM or GDM                       | 194 (4.2%)         | 471 (2.8%)              | <0.01           | 665 (3.1%)            |
| Histological chorioamnionitis   | 649 (14.0%)        | 8,575 (50.4%)           | <0.01           | 9,224 (42.6%)         |
| Antenatal corticosteroid        | 2,477 (53.5%)      | 9,764 (57.3%)           | <0.01           | 12,241 (56.5%)        |
| PROM                            | 189 (4.1%)         | 7,743 (45.5%)           | <0.01           | 7,932 (36.6%)         |
| Year of delivery                |                    |                         | <0.01           |                       |
| 2003-2008                       | 1,191 (25.7%)      | 5,339 (31.4%)           |                 | 6,530 (30.1%)         |
| 2009-2015                       | 3,438 (74.3%)      | 11,691 (68.6%)          |                 | 15,129 (69.9%)        |
| <b>Neonatal characteristics</b> |                    |                         |                 |                       |
| Male                            | 2,145 (46.3%)      | 9,146 (53.7%)           | <0.01           | 11,291 (52.1%)        |
| Birth weight (g)                | 916 ± 291          | 964 ± 298               | <0.01           | 954 ± 297             |
| Height (cm)                     | 34.1 ± 4.0         | 34.3 ± 4.0              | <0.01           | 34.3 ± 4.0            |
| SGA (%)                         | 2,495 (53.9%)      | 2,010 (11.8%)           | <0.01           | 4,505 (20.8%)         |

Data are given as mean ± standard deviation for continuous variables and n (%) for categorical variables. HDP, hypertensive disorders of pregnancy; DM, diabetes mellitus; GDM, gestational diabetes mellitus; PROM, premature rupture of membranes; SGA: small for gestational age.

Supplementary Table 3. Mortality and severe neurological outcomes in the HDP and non-HDP groups after excluding cases with histological chorioamnionitis

| Variables                     | HDP               | non-HDP         | Crude OR (95% CI)       | Adjusted OR (95% CI)    |
|-------------------------------|-------------------|-----------------|-------------------------|-------------------------|
| Short-term outcomes           | (n = 3,941)       | (n = 2,541)     |                         |                         |
| IVH (grade III or IV)         | 88/3,923 (2.2%)   | 76/2,527 (3.0%) | 0.74 (0.54–1.01)        | <b>0.48 (0.35–0.68)</b> |
| Periventricular leukomalacia  | 93/3,928 (2.4%)   | 91/2,531 (3.6%) | <b>0.65 (0.49–0.87)</b> | <b>0.61 (0.45–0.84)</b> |
| Neonatal seizures             | 57/3,936 (1.4%)   | 51/2,540 (2.0%) | 0.72 (0.49–1.05)        | <b>0.46 (0.31–0.70)</b> |
| In-hospital death             | 147/3,941 (3.7%)  | 80/2,540 (3.1%) | 1.19 (0.90–1.57)        | <b>0.55 (0.40–0.75)</b> |
| Medium-term outcomes          | (n = 1,836)       | (n = 1,128)     |                         |                         |
| Cerebral palsy                | 93/1,608 (5.8%)   | 69/995 (6.9%)   | 0.82 (0.60–1.14)        | <b>0.68 (0.48–0.96)</b> |
| Developmental quotient of <70 | 191/1,162 (16.4%) | 82/695 (11.8%)  | <b>1.47 (1.11–1.94)</b> | 1.15 (0.84–1.57)        |
| Total death by 3 years of age | 157/1,836 (8.6%)  | 88/1,128 (7.8%) | 1.11 (0.84–1.45)        | <b>0.54 (0.39–0.74)</b> |

Data are given as n (%). Bold text indicates a significant association. Multivariate analysis was adjusted by diabetes mellitus or gestational diabetes mellitus, administration of antenatal corticosteroid, mode of delivery, gender, and birth weight. HDP, hypertensive disorders of pregnancy; IVH, intraventricular haemorrhage; OR, odds ratio; CI, confidence interval.

Supplementary Table 4. Mortality and severe neurological outcomes in the HDP and non-HDP groups born prior to 28 weeks of gestation

| Variables                     | HDP               | non-HDP          | Crude OR (95% CI)       | Adjusted OR (95% CI)    |
|-------------------------------|-------------------|------------------|-------------------------|-------------------------|
| Short-term outcomes           | (n = 1,486)       | (n = 1,486)      |                         |                         |
| IVH (grade III or IV)         | 81/1,475 (5.5%)   | 114/1,478 (7.7%) | <b>0.70 (0.52–0.93)</b> | <b>0.52 (0.36–0.74)</b> |
| Periventricular leukomalacia  | 54/1,478 (3.7%)   | 67/1,481 (4.5%)  | 0.80 (0.56–1.15)        | 0.88 (0.56–1.40)        |
| Neonatal seizures             | 44/1,480 (3.0%)   | 61/1,484 (4.1%)  | 0.72 (0.48–1.06)        | <b>0.42 (0.26–0.68)</b> |
| In-hospital death             | 154/1,486 (10.4%) | 105/1,485 (7.1%) | <b>1.52 (1.17–1.97)</b> | <b>0.60 (0.43–0.84)</b> |
| Medium-term outcomes          | (n = 774)         | (n = 743)        |                         |                         |
| Cerebral palsy                | 69/580 (11.9%)    | 54/596 (9.1%)    | 1.36 (0.93–1.97)        | 1.08 (0.67–1.75)        |
| Developmental quotient of <70 | 120/440 (27.3%)   | 85/434 (19.6%)   | <b>1.54 (1.12–2.11)</b> | 0.92 (0.61–1.39)        |
| Total death by 3 years of age | 161/774 (20.8%)   | 114/743 (15.3%)  | <b>1.45 (1.11–1.89)</b> | <b>0.57 (0.41–0.82)</b> |

Data are given as n (%). Bold text indicates a significant association. Multivariate analysis was adjusted by diabetes mellitus or gestational diabetes mellitus, histological chorioamnionitis, administration of antenatal corticosteroid, mode of delivery, gender, and birth weight. HDP, hypertensive disorders of pregnancy; IVH, intraventricular haemorrhage; OR, odds ratio; CI, confidence interval.

Supplementary Table 5. Mortality and severe neurological outcomes in the HDP and non-HDP groups born between 28 and 31 weeks of gestation

| Variables                     | HDP             | non-HDP          | Crude OR (95% CI)       | Adjusted OR (95% CI)    |
|-------------------------------|-----------------|------------------|-------------------------|-------------------------|
| Short-term outcomes           | (n = 3,098)     | (n = 3,098)      |                         |                         |
| IVH (grade III or IV)         | 27/3,090 (0.9%) | 43/3,087 (1.4%)  | 0.62 (0.39–1.01)        | <b>0.58 (0.34–0.99)</b> |
| Periventricular leukomalacia  | 57/3,089 (1.8%) | 114/3,087 (3.7%) | <b>0.49 (0.36–0.68)</b> | <b>0.52 (0.36–0.74)</b> |
| Neonatal seizures             | 19/3,097 (0.6%) | 37/3,095 (1.2%)  | <b>0.51 (0.29–0.89)</b> | <b>0.42 (0.23–0.76)</b> |
| In-hospital death             | 27/3,097 (0.9%) | 35/3,097 (1.1%)  | 0.77 (0.47–1.27)        | <b>0.51 (0.30–0.88)</b> |
| Medium-term outcomes          | (n = 1,340)     | (n = 1,226)      |                         |                         |
| Cerebral palsy                | 43/1,265 (3.4%) | 66/1,141 (5.8%)  | <b>0.57 (0.39–0.85)</b> | <b>0.53 (0.34–0.81)</b> |
| Developmental quotient of <70 | 96/904 (10.6%)  | 82/830 (9.9%)    | 1.08 (0.79–1.48)        | 0.89 (0.63–1.27)        |
| Total death by 3 years of age | 31/1,340 (2.3%) | 45/1,226 (3.7%)  | <b>0.62 (0.39–0.99)</b> | <b>0.49 (0.29–0.80)</b> |

Data are given as n (%). Bold text indicates a significant association. Multivariate analysis was adjusted by diabetes mellitus or gestational diabetes mellitus, histological chorioamnionitis, administration of antenatal corticosteroid, mode of delivery, gender, and birth weight. HDP, hypertensive disorders of pregnancy; IVH, intraventricular haemorrhage; OR, odds ratio; CI, confidence interval.
